# Supplementary material
Source: publisher site journal article supplement (https://www.dovepress.com/article/430488)
Supplement: Supplementary file 1 [file get_supplementary_file.php]

**Supplementary Information**

**Supplementary Table 1.** The R packages used in our study.

**Supplementary Table 2.** Comparison of clinical characteristics of endotracheally intubated patients in the training cohort and the validation cohort.

**Supplementary Table 3.** Correlation of different induction agents with post-intubation hypotensive patients.

**Supplementary Table 4.** Coefficients and lambda.1-SE value of the LASSO regression.

**Supplementary Table 5.** Association between risk factors and post-intubation hypotension in multivariate logistic regression.

**Supplementary Table 6.** Diagnostic performance of a nomogram model for post-intubation hypotension in the training cohort and validation cohort.

**Supplementary Table 1.** The R packages used in our study.

| **Function** | **Packages** |
| --- | --- |
| Least absolute shrinkage and selection operator (LASSO) regression | “glmnet” and “car” packages; |
| Forest plot | “forestplot” package; |
| Nomograms and calibration curves | “rms” and “Hmisc” packages; |
| Receiver operating characteristic curve | “pROC”, “ROCR” and “gplots” packages |
| Decision curve analysis and clinical impact curve | “rmda” package; |
| Kaplan-Meier curves | “survival”, “dplyr” and “survminer” packages |

**Supplementary Table 2.** Comparison of clinical characteristics of endotracheally intubated patients in the training cohort and the validation cohort.

| **Variables** | **All patients**  **（*n*=500）** | **Training cohort （*n*=351）** | **Validation cohort（*n*=149）** | ***P* Value** |
| --- | --- | --- | --- | --- |
| **Gender, *n* (%)** |  |  |  | 0.101 |
| Male§ | 319(63.8) | 232(66.1) | 87(58.4) |  |
| Female§ | 181(36.2) | 119(33.9) | 62(41.8) |  |
| Age (years)*†* | 64.73±17.32 | 64.12±16.98 | 66.15±18.08 | 0.226 |
| BMI (kg/m2)*†* | 20.13±2.13 | 20.02±1.98 | 20.41±2.43 | 0.058 |
| **Physiological data on admission** |  |  |  |  |
| Heart rates (beats/min)*†* | 118.84±31.64 | 118.62±30.19 | 119.36±34.93 | 0.275 |
| Respiratory rate (beats/min)*†* | 30.46±11.51 | 30.78±12.00 | 29.70±10.28 | 0.341 |
| Oxygen saturation (%)*†* | 79.82±23.48 | 80.45±24.34 | 78.34±21.32 | 0.358 |
| SBP (mm Hg)*†* | 124.62±30.52 | 126.29±26.92 | 124.67±27.48 | 0.891 |
| DBP (mm Hg)*†* | 70.82±24.75 | 70.53±25.63 | 71.52±22.62 | 0.683 |
| MAP (mm Hg)*†* | 87.30±28.71 | 87.04±29.58 | 87.89±26.65 | 0.762 |
| **Comorbidity, *n* (%)** |  |  |  |  |
| Hypertension§ | 169(33.8) | 116(33.0) | 53(35.6) | 0.586 |
| Coronary artery disease§ | 113(22.6) | 81(23.1) | 32(21.5) | 0.696 |
| Diabetes mellitus§ | 120(24.0) | 86(24.5) | 34(22.8) | 0.687 |
| COPD§ | 164(32.8) | 107(30.5) | 57(38.3) | 0.090 |
| Chronic renal failure§ | 121(24.2) | 82(23.4) | 39(26.2) | 0.502 |
| Sepsis§ | 193(38.6) | 143(40.7) | 50(33.6) | 0.131 |
| **Severity on admission** |  |  |  |  |
| APACHE Ⅱ score* | 14.00(9.00-18.00) | 14.00(9.00-18.00) | 14.00(9.00-18.00) | 0.405 |
| GCS* | 9.00(7.00-12.00) | 9.00(7.00-12.00) | 10.00(7.00-12.00) | 0.433 |
| **Use of induction agent, *n* (%)** | 401(80.2) | 274(78.1) | 127(85.2) | 0.066 |
| **Laboratory tests** |  |  |  |  |
| White blood cell count (×109/L)* | 10.67(6.34-15.89) | 10.95(7.12-16.34) | 10.14(6.19-14.39) | 0.086 |
| Neutrophils (G/L)* | 9.34(5.47-13.35) | 9.45(5.65-13.62) | 8.78(4.87-12.35) | 0.248 |
| Percentage of neutrophils (%)* | 87.25(80.33-92.40) | 87.40(80.00-92.40) | 87.10(82.10-92.45) | 0.566 |
| Lymphocytes (G/L)* | 1.19(0.81-1.53) | 1.22(0.81-1.60) | 1.15(0.81-1.50) | 0.285 |
| NLR* | 7.53(4.08-13.31) | 7.53(3.73-13.64) | 7.54(4.18-12.70) | 0.914 |
| Hematocrit (L/L)* | 0.33(0.27-0.40) | 0.33(0.27-0.40) | 0.33(0.28-0.39) | 0.719 |
| Hemoglobin (g/L)* | 107.00(84.00-130.75) | 107.00(84.00-130.00) | 107.00(83.00-134.00) | 0.517 |
| Albumin (g/L)* | 29.80(26.10-33.80) | 29.80(26.20-34.20) | 29.80(25.20-33.40) | 0.480 |
| Serum creatinine (μmol/L)* | 84.50(57.00-145.00) | 87.00(59.00-147.00) | 82.00(54.00-144.00) | 0.295 |
| K+ (mmol/L)* | 3.81(3.40-4.50) | 3.80(3.40-4.50) | 3.87(3.43-4.46) | 0.828 |
| Na+ (mmol/L)* | 135.10(130.93-139.70) | 134.80(130.70-139.60) | 135.70(132.15-140.60) | 0.126 |
| Blood glucose concentration (mmol/L)* | 8.40(6.32-11.71) | 8.40(6.40-11.70) | 8.34(6.15-11.75) | 0.805 |
| PH* | 7.36(7.26-7.44) | 7.36(7.24-7.44) | 7.36(7.27-7.43) | 0.676 |
| PaCO2 (mmHg)* | 38.70(30.63-51.53) | 36.60(29.30-51.60) | 41.30(33.40-50.35) | 0.012 |
| PaO2 (mmHg)* | 69.80(57.50-91.38) | 70.50(58.10-93.10) | 68.10(54.45-89.25) | 0.189 |
| HCO3- (mmol/L)* | 21.20(16.80-25.38) | 20.50(16.10-25.40) | 22.20(18.25-25.35) | 0.132 |
| Lactate (mmol/L)* | 2.30(1.50-3.80) | 2.30(1.60-4.30) | 2.10(1.50-3.45) | 0.242 |
| **Outcomes, *n* (%)** |  |  |  |  |
| PIH | 234(46.8) | 162(46.2) | 72(48.3) | 0.657 |

*†* Normally distributed continuous variables are presented as means with standard deviations and analyzed by Student’ s t-test.

* Non-normally distributed continuous variables are presented as medians with interquartile ranges and analyzed by non-parametric test.

§ Categorical variables are presented as frequencies with percentages and analyzed by Chi-square test or Fisher’ s exact test.

BMI, body mass index; SBP, systolic blood pressure; DBP, diastolic blood pressure; MAP, mean arterial pressure; COPD, chronic obstructive pulmonary disease; APACHE Ⅱ score, acute physiology and chronic health evaluation Ⅱ score; GCS, glasgow coma scale; NLR, neutrophil-to-lymphocyte ratio; PIH, post-intubation hypotension.

**Supplementary Table 3.** Correlation of different induction agents with post-intubation hypotensive patients.

| **Agents** | **All patients**  **（*n*=500）** | **non-PIH**  **（*n*=266）** | **PIH**  **（*n*=234）** | **χ2** | ***P* Value** |
| --- | --- | --- | --- | --- | --- |
| **Types of inductants, *n*(%)** |  |  |  |  |  |
| Propofol | 273(54.6) | 126(47.4) | 147(62.8) | 11.991 | 0.001 |
| Midazolam | 139(27.8) | 65(24.4) | 74(31.6) | 3.204 | 0.073 |
| Remifentanil | 51(10.2) | 19(7.1) | 32(13.7) | 5.800 | 0.016 |
| **Combination of induction agents, *n*(%)** |  |  |  | 37.754 | ＜0.001 |
| 0 | 99(19.8) | 79(29.7) | 20(8.5) |  |  |
| 1 | 339(67.8) | 164(61.7) | 175(74.8) |  |  |
| 2 | 62(12.4) | 23(8.6) | 39(16.7) |  |  |

**Supplementary Table 4.** Coefficients and lambda.1-SE value of the LASSO regression.

| **Variables** | **Coefficients** | **Lambda.1-SE** | **log(Lambda)** |
| --- | --- | --- | --- |
| Intercept | 0.442 | 0.056 | -2.883 |
| Age (years) | 0.004 |  |  |
| BMI (kg/m2) | -0.199 |  |  |
| **Physiological data on admission** |  |  |  |
| Heart rates (beats/min) | 0.001 |  |  |
| SBP (mm Hg) | 0.014 |  |  |
| **Comorbidity** |  |  |  |
| COPD | 0.348 |  |  |
| **Severity on admission** |  |  |  |
| APACHE Ⅱ score | 0.063 |  |  |
| **Use of induction agent** | 0.368 |  |  |

BMI, body mass index; SBP, systolic blood pressure; COPD, chronic obstructive pulmonary disease; APACHE Ⅱ score, acute physiology and chronic health evaluation Ⅱ score.

**Supplementary Table 5.** Association between risk factors and post-intubation hypotension in multivariate logistic regression.

| **Variables** | ***β*** | **OR(95% CI)** | ***P* value** |
| --- | --- | --- | --- |
| Intercept | -2.004 |  | 0.296 |
| Age (years) | 0.021 | 1.022(1.004-1.040) | 0.016 |
| BMI (kg/m2) | -0.386 | 0.680(0.585-0.790) | ＜0.001 |
| **Physiological data on admission** |  |  |  |
| Heart rates (beats/min) | 0.014 | 1.014(1.004-1.024) | 0.005 |
| SBP (mm Hg) | 0.029 | 1.029(1.018-1.041) | ＜0.001 |
| **Comorbidity** |  |  |  |
| COPD | 0.851 | 2.341(1.257-4.361) | 0.007 |
| **Severity on admission** |  |  |  |
| APACHE Ⅱ score | 0.112 | 1.118(1.056-1.185) | ＜0.001 |
| **Use of induction agent** | 1.275 | 3.579(2.216-4.937) | 0.001 |

BMI, body mass index; SBP, systolic blood pressure; COPD, chronic obstructive pulmonary disease; APACHE Ⅱ score, acute physiology and chronic health evaluation Ⅱ score.

**Supplementary Table 6.** Diagnostic performance of a nomogram model for post-intubation hypotension in the training cohort and validation cohort.

| **Variable** | **Value** | |
| --- | --- | --- |
| **Training Cohort** | **Validation Cohort** |
| AUROC | 0.856 (0.818-0.894) | 0.849 (0.788-0.910) |
| Sensitivity | 0.809 | 0.833 |
| Specificity | 0.751 | 0.714 |
| Cut-off value | 0.428 | 0.452 |
| False positive rate | 0.249 | 0.286 |
| False negative rate | 0.191 | 0.167 |

AUROC, area under the receiver operating characteristic curve.
